## RESEARCH ARTICLE

# Association between illegal drug use and cigarette smoking among Ethiopian students: A systematic review and meta-analysis

Chala Daba<sup>1\*</sup>, Mesfin Gebrehiwot<sup>1</sup>, Sisay Abebe Debela<sup>2</sup>, Belay Desye<sup>3</sup>, Yonatal Mesfin Tefera<sup>4</sup>

**1** Department of Environmental Health, College of Medicine and Health Sciences, Wollo University, Dessie, Ethiopia, **2** Department of Public Health, College of Health Science, Salale University, Fitcha, Ethiopia, **3** Department of Public Health, College of Medicine and Health Sciences, Adigrat University, Adigrat, Ethiopia, **4** Adelaide Exposure Science and Health, School of Public Health, University of Adelaide, Adelaide, Australia

\* [chaladaba293@gmail.com](mailto:chaladaba293@gmail.com)

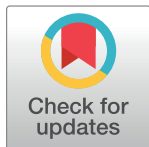

## Abstract

### Introduction

Cigarette smoking is a persistent public health problem as it is a risk factor for many diseases. Previous studies on the role of illegal drug use in cigarette smoking have yielded disparate and inconclusive results, hindering the development of effective intervention strategies to address this issue. Therefore, this systematic review and meta-analysis aimed to estimate the pooled prevalence of cigarette smoking and its associated factors, with a specific focus on the influence of illegal drug use among students in Ethiopia.

### Methods

We conducted a comprehensive search of international databases, including PubMed, Cochrane Library, Science Direct, CINAHL, African Journals Online, HINARI, Global Health, and Google and Google Scholar. Grey literature was also identified from various university digital libraries. The study followed the Preferred Reporting Items for Systematic Reviews and Meta-Analysis Protocols (PRISMA) guidelines. Due to the high heterogeneity among the included studies ( $I^2 = 98.6\%$ ;  $p$ -value  $< 0.001$ ), we employed a random-effects model with a 95% confidence interval (CI) to estimate the pooled effect using STATA 14 software. The publication bias was assessed using a statistical Egger regression test.

### Results

A total of 22 studies involving 18,144 students met the eligibility criteria for this systematic review and meta-analysis. The pooled prevalence of lifetime and current cigarette smoking among students in Ethiopia was 13.8% (95% CI: 9.90–17.82) and 9.61% (95% CI: 7.19–12.03), respectively. Students who used illegal drugs were twenty-three times more likely to smoke cigarettes compared to their counterparts (OR = 23.57, 95% CI: 10.87–51.1). Living

## OPEN ACCESS

**Citation:** Daba C, Gebrehiwot M, Debela SA, Desye B, Tefera YM (2024) Association between illegal drug use and cigarette smoking among Ethiopian students: A systematic review and meta-analysis. PLoS ONE 19(6): e0304948. <https://doi.org/10.1371/journal.pone.0304948>

**Editor:** Minale Tareke, Bahir Dar University, ETHIOPIA

**Received:** November 8, 2023

**Accepted:** May 21, 2024

**Published:** June 20, 2024

**Copyright:** © 2024 Daba et al. This is an open access article distributed under the terms of the [Creative Commons Attribution License](https://creativecommons.org/licenses/by/4.0/), which permits unrestricted use, distribution, and reproduction in any medium, provided the original author and source are credited.

**Data Availability Statement:** All relevant data are within the manuscript and its [Supporting Information](#) files.

**Funding:** The author(s) received no specific funding for this work.

**Competing interests:** The authors have declared that no competing interests exist.

in urban settings (OR = 2.9; 95% CI: 1.15–7.28) and the habit of alcohol consumption (OR = 4.79; 95% CI: 1.57–14.64) were also identified as factors associated with cigarette smoking.

## Conclusions

We found that more than one in eight students in Ethiopia have engaged in lifetime cigarette smoking. Notably, students who used illegal drugs exhibited a significantly higher likelihood of cigarette smoking. In light of these findings, it is imperative to implement comprehensive public health interventions that target illegal drug use, cigarette smoking, and alcohol consumption, with a particular emphasis on urban residents.

## Introduction

One-third of the global population consumes tobacco products, including cigarette [1]. In 2019, as per the World Health Organisation (WHO) report, over 24 million individuals between the ages of 13 and 15 engaged in cigarette smoking [2]. In 2016, an estimated 13.8 million students between the ages of 15 and 16 used illegal drugs, with the highest prevalence among students in Europe [3, 4].

In developing countries, cigarette smoking is a neglected health problem and a significant cause of adult mortality and morbidity [5], with 80% of tobacco-related mortality and morbidity occurring in these regions [6]. Evidence from a systematic review and meta-analysis in Sub-Saharan Africa showed that the magnitude of substance abuse, including cigarette smoking and illegal drug use, was 41.6% [7]. It is also well documented that cigarette smoking is a significance risk factors for the majority of psychiatric disorders [8, 9]. Evidence from meta-analysis showed that cigarette smoking could increase the risk of dementia and the development of Alzheimer disease [10]. Likewise, observational studies linked cigarette smoking with increased risk of a number of psychiatric disorders, including suicide, major depressive disorder, and bipolar disorder [11, 12]. Beyond its health implications, cigarette smoking also has a detrimental impact on academic performance, increasing the risk of unwanted pregnancies, and unprotected sexual activity [4, 7, 13–15].

In Ethiopia, there is a growing and persistent issue of cigarette smoking among students, both at Universities and high schools, posing a significant public health concern [16]. This risk is exacerbating mainly due to high prevalence of illegal drug use among students. Notable statistics include a 43.5% prevalence of cigarette smoking among Dire-Dawa University students [17], 39.5% among Haramaya University students [18], and 28.6% among high school students in Oromia and the Southern Nation, Nationality and People Region (SNNPR) [19].

The previous studies conducted on the link between illegal drug use and cigarette smoking among high school and university students were highly dispersed and inconclusive [20–23]. While there is an acknowledgement of an increasing prevalence of cigarette smoking and its impact on public health, there is a dearth of a consolidated analysis that integrates data on illegal drug use and cigarette smoking, particularly concerning students. Therefore, this systematic review aims to address this gap by providing a thorough examination of the collective prevalence of cigarette smoking and its determinants among Ethiopian students, with special attention to the role of illegal drug use. The findings of this systematic review can be instrumental in informing evidence-based public health interventions and policies aimed at tackling the growing issue of cigarette smoking among Ethiopian students.

## Methods and materials

**Protocol registration:** This systematic review has been registered in the International Prospective Registry of Systematic Review (PROSPERO) with a specific registration number CRD42023443461.

### Study selection, search strategy and study period

This systematic review and meta-analysis followed the Preferred Reporting Items for Systematic Reviews and Meta-Analysis Protocols (PRISMA) guidelines [24] (S1 Checklist). The studies were retrieved from international electronic databases; PubMed, Cochrane Library, Science direct, CINAHL, African Journals Online, HINARI, Global Health, and Google and Google Scholar searches. Grey literature was also identified from different universities digital libraries. The following key terms were used to search the studies: "impact", "effect", "illegal drug use", "illicit drug use", "cigarette smoking", "tobacco smoking", "tobacco consumption", "tobacco chewing", "university student", "student", "high school student", "college student", "associated factors", "risk factors", and "Ethiopia". All key terms were combined using the Boolean operators "AND" or "OR" as appropriate. The search was carried out from July 1 to August 15, 2023, by four authors independently (CD, MG, BD, and SAD). Those studies searched from selected databases were transferred to Endnote, and duplicate files were excluded.

### Inclusion and exclusion criteria

In this meta-analysis, we included observational studies (cross-sectional, case-control, and cohort studies) on cigarette smoking and associated factors among students in Ethiopia. However, qualitative studies, unretrievable studies, editorial letters, studies with poor methodological quality, and studies that did not report the outcome of interest were excluded from the meta-analysis.

### Outcome assessment

The primary aim of this study was to determine the prevalence of cigarette smoking among Ethiopian students. Besides, the study aimed to identify the factors associated with lifetime cigarette smoking in the form of a log odds ratio.

### Data extraction and risk of bias assessment

Two authors (CD and MG) independently extracted the necessary data using Microsoft Excel 2013. The data extraction template consisted of various study details, such as author names, region and type of student (S1 File). After removing duplicates, two authors (CD and SAD) screened the relevant articles for inclusion. The quality of each article was evaluated using the Joana Brigg Institute (JBI) critical appraisal checklist [25] (S2 File). Each study's quality was independently assessed on a scale of 100% by the five authors (CD, BD, MG, YM, and SAD). In cases of any discrepancies during the quality assessment, the mean score was calculated from the results of all reviewers to resolve differences.

### Statistical analysis

STATA version 14 software was used to analyse the data. A Forest plot was used to present the prevalence of lifetime and current cigarette smoking among students in Ethiopia. Because extreme heterogeneity was observed among the included studies ( $I^2 = 98.6\%$ ,  $p\text{-value} < 0.001$ ), random-effects model was used to determine the pooled prevalence of cigarette smoking among students in Ethiopia. The random-effects model was used to determine the pooled

prevalence of both lifetime and current cigarette smoking. Heterogeneity was assessed using the Higgs  $I^2$  statistic, with values of 25%, 50%, and, 75% indicating low, moderate, and high heterogeneity, respectively [26]. A p-value of less than 0.05 was considered indicative of the presence of heterogeneity.

A sensitivity analysis was performed to assess the influence of a single study on the pooled prevalence estimates. Subgroup analysis was also conducted based on various study characteristics, such as region (Oromo, SNNPR, Amhara, Tigray, or other), type of student (university, college, or high school). In addition, publication bias was assessed using Egger's test with a p-value less than 0.05 suggesting a publication bias [27]. Moreover, univariable meta-regression analysis was conducted considering variables, such as type of student, region, and year of publication, in relation to the outcome variable.

## Results

### Study selection

A total of 712 articles were initially identified from database searches. Using the Endnote reference manager, 103 duplicate articles were removed; while 592 were excluded as they did not

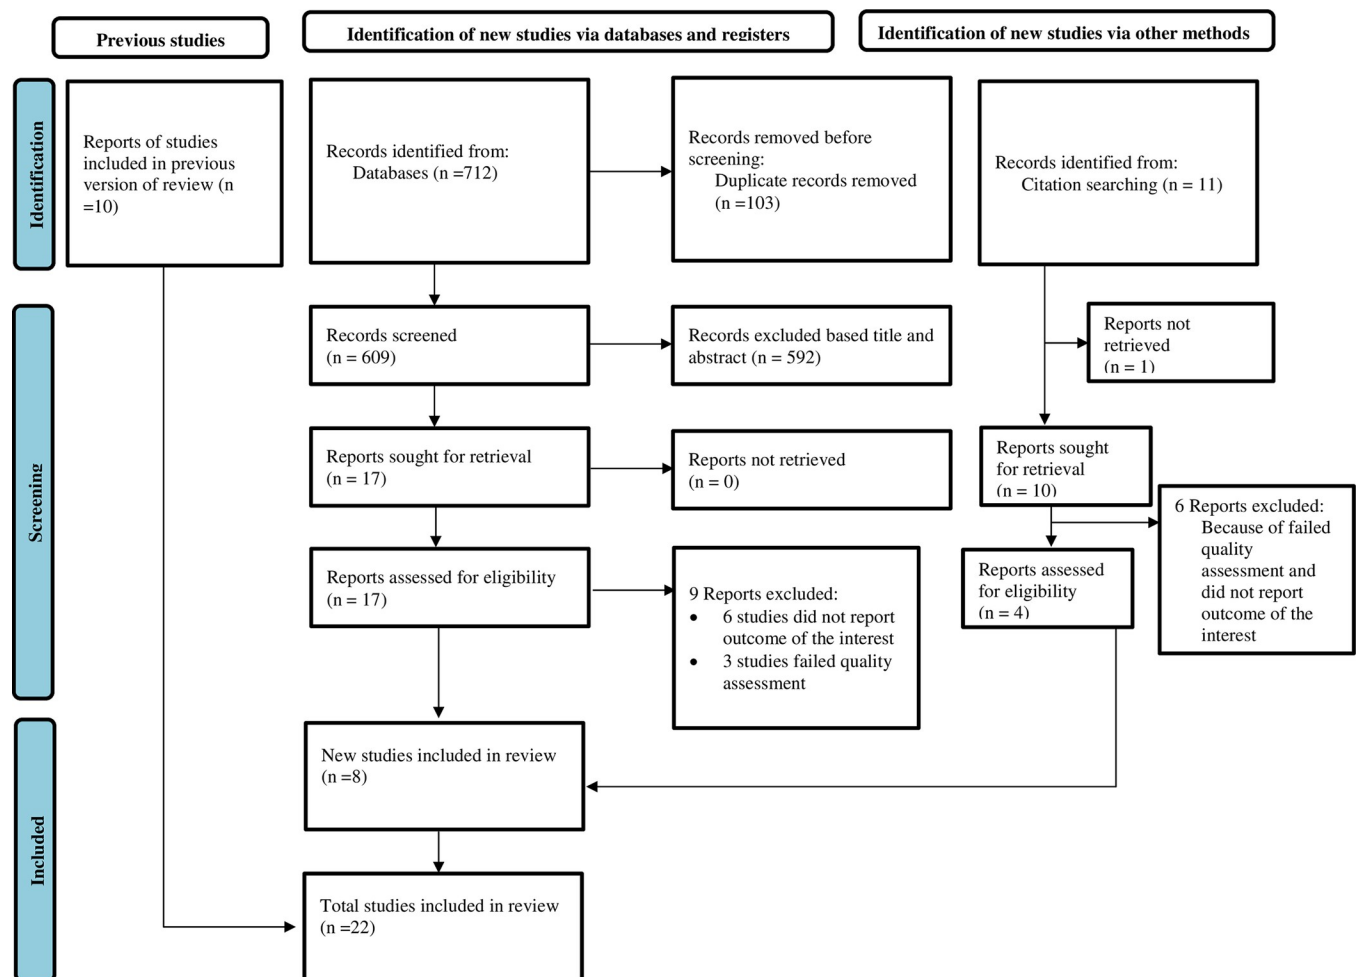

**Fig 1. PRISMA flow diagram of the included studies for the systematic review and meta-analysis on the association between illegal drug use and cigarette smoking among students in Ethiopia, 2023.**

<https://doi.org/10.1371/journal.pone.0304948.g001>

**Table 1. A descriptive summary of twenty-two studies included estimating the pooled prevalence of tobacco smoking among students in Ethiopia, 2023.**

| Authors                 | Year of publication | Region           | Sample size (respond the question) | Response rate (%) | Lifetime prevalence (%) | Current prevalence (%) | Quality score (8) |
|-------------------------|---------------------|------------------|------------------------------------|-------------------|-------------------------|------------------------|-------------------|
| Hagos et al [34]        | 2016                | Tigray           | 271                                | 100               | 11.4                    | 5.0                    | 7                 |
| Telayneh et al [42]     | 2021                | Amhara           | 605                                | 96.7              | NA                      | 6.8                    | 6                 |
| Seid et al [40]         | 2021                | Addis Ababa      | 383                                | 97.7              | 9.6                     | 6.4                    | 7                 |
| Reda et al [39]         | 2012                | Harari           | 1890                               | 91.1              | 12.2                    | 4.2                    | 6                 |
| Dereje et al [19]       | 2014                | SNNPR and Oromia | 1704                               | 98.2              | 28.6                    | 17.2                   | 7                 |
| Eticha et al [22]       | 2014                | Tigray           | 193                                | 100               | NA                      | 29.5                   | 7                 |
| Deressa et al [30]      | 2011                | Addis Ababa      | 632                                | 98.4              | 9                       | 1.8                    | 8                 |
| Alebachew et al [18]    | 2019                | Oromia           | 254                                | 98.8              | 39.5                    | 37.4                   | 8                 |
| Hirpha et al [23]       | 2023                | All regions      | 3457                               | 97                | 4.7                     | 2.4                    | 7                 |
| Gebreslassie et al [33] | 2013                | Tigray           | 764                                | 98.7              | 9.5                     | 9.3                    | 7                 |
| Gebremariam et al [32]  | 2018                | Amhara           | 659                                | 89                | 7.4                     | 3.1                    | 6                 |
| Tesfaye et al [36]      | 2014                | Oromia           | 1040                               | 98.3              | 22                      | 10.8                   | 6                 |
| Adere et al [28]        | 2017                | Amhara           | 730                                | 89.7              | 7.9                     | 6.4                    | 7                 |
| Bago et al [29]         | 2017                | SNNPR            | 336                                | 92.3              | 20.6                    | NA                     | 8                 |
| Kumesa et al [41]       | 2020                | Oromia           | 356                                | 97.7              | 18.4                    | 14.9                   | 7                 |
| Banti et al [20]        | 2017                | Somalia          | 648                                | 92.3              | NA                      | 14.5                   | 7                 |
| Tsegay et al [37]       | 2014                | Amhara           | 845                                | 94.6              | 11.3                    | 3.9                    | 6                 |
| Kumburi et al [17]      | 2017                | Dire-Dawa        | 1239                               | 75.1              | 43.5                    | 41.2                   | 6                 |
| Mekonen et al [35]      | 2017                | SNNPR            | 747                                | 97.1              | 5.7                     | NA                     | 7                 |
| Dida et al [38]         | 2014                | Oromia           | 603                                | 97.9              | 13.1                    | 4.6                    | 7                 |
| Desta et al [31]        | 2018                | Oromia           | 188                                | 98.9              | 5.9                     | 5.4                    | 7                 |
| Duko et al [21]         | 2019                | SNNPR            | 600                                | 94                | 11                      | 9.4                    | 8                 |

Hint: NA- Not available

<https://doi.org/10.1371/journal.pone.0304948.t001>

meet the inclusion criteria based on their titles and abstracts. Besides, 9 articles were excluded based on the quality of the assessment and the outcomes of the studies. Finally, 22 full-text articles were deemed eligible for systematic review and meta-analysis (Fig 1).

### Characteristics of the included studies

These studies involved a total of 18,144 participants, with fourteen studies focusing on university students [17, 18, 20, 22, 28–37], six studies on high school students [19, 21, 23, 38–40], and two studies on college students [41, 42]. Among the included studies, the highest reported prevalence of lifetime cigarette smoking was found in a study conducted in the Oromia region (39.5%) [18], while the lowest prevalence was observed in a study encompassing eleven regions of Ethiopia (4.7%) [23]. Regarding sample size, the studies included in the analysis ranged from a maximum of 3,457 participants [23] to a minimum of 188 participants [30] (Table 1).

### Meta-analysis

The current meta-analysis showed that the pooled prevalence of lifetime cigarette smoking among students in Ethiopia was 13.8% (95% CI: 9.90–17.82) (Fig 2). The pooled prevalence of current cigarette smoking among students in Ethiopia was 9.61% (95% CI: 7.19–12.03) (Fig 3).

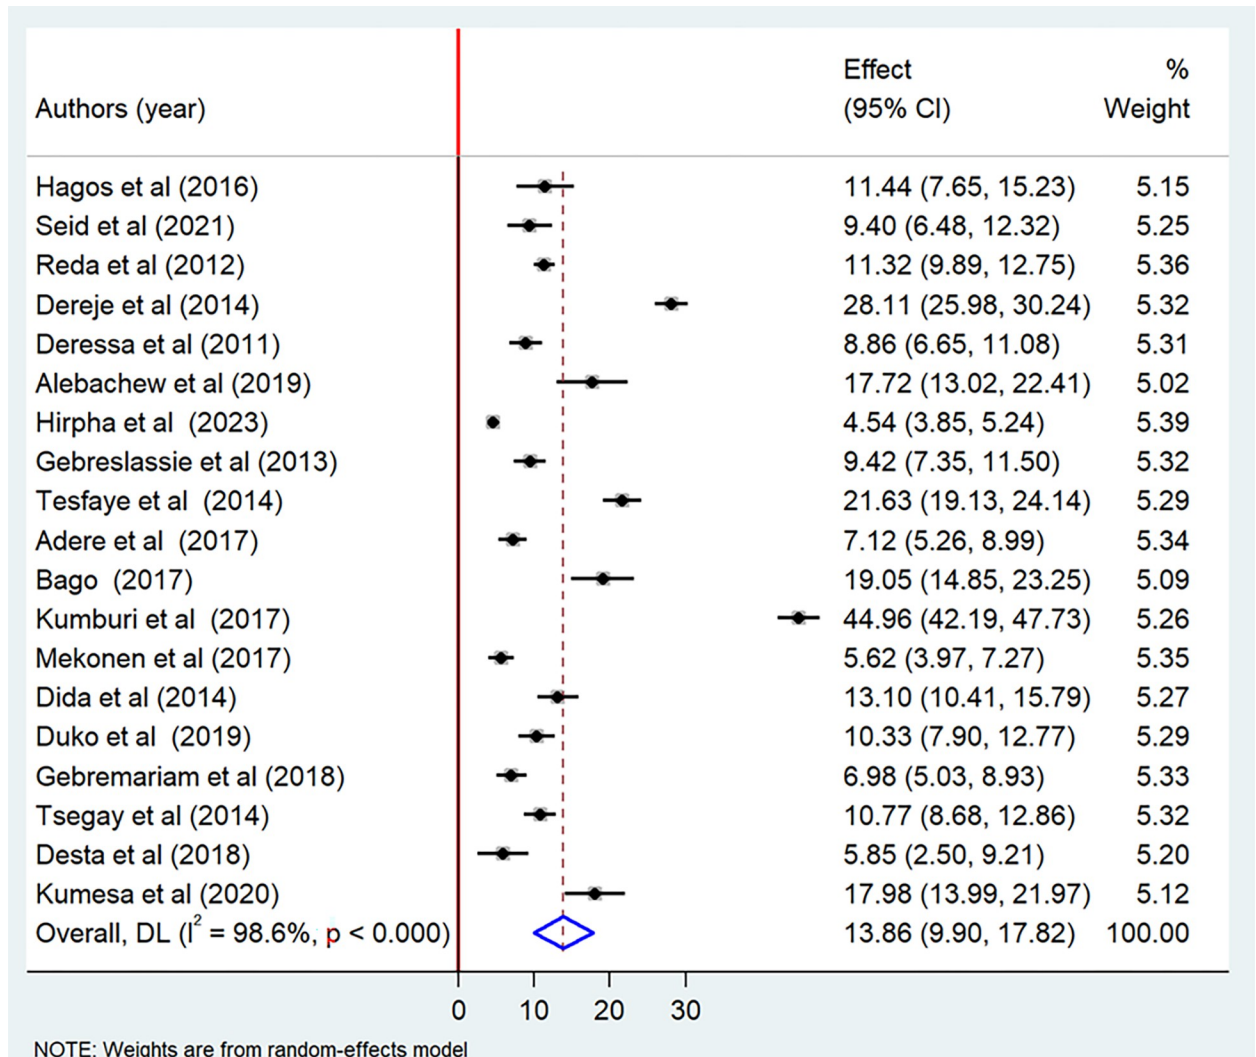

Fig 2. Forest plot of the pooled prevalence of lifetime cigarette smoking among students in Ethiopia, 2023.

<https://doi.org/10.1371/journal.pone.0304948.g002>

### Test for publication bias

Publication bias was assessed through a visual inspection of the funnel plot, revealing an asymmetric distribution that strongly indicated the presence of publication bias (Fig 4). Further statistical analysis employing the Egger regression test corroborated the significant presence of publication bias ( $p = 0.021$ ). To pinpoint the sources of this bias, a trim and fill analysis was conducted, revealing notable variation in the newly estimated pooled odds ratio, denoted as the adjusted point estimate [OR = 1.89, (95% CI: 1.52–2.26)], when compared to the initial or observed point estimate [OR = 2.39, (95% CI: 2.05–2.73)] (Fig 5).

### Subgroup analysis

In this systematic review and meta-analysis, we conducted subgroup analyses based on the type of student (university, high school, or college) and the region where the studies were conducted. In terms of region, the pooled prevalence of lifetime cigarette smoking was found to be highest among students in the Oromia region (17.44%, 95% CI: 10.73–24.16), while the lowest

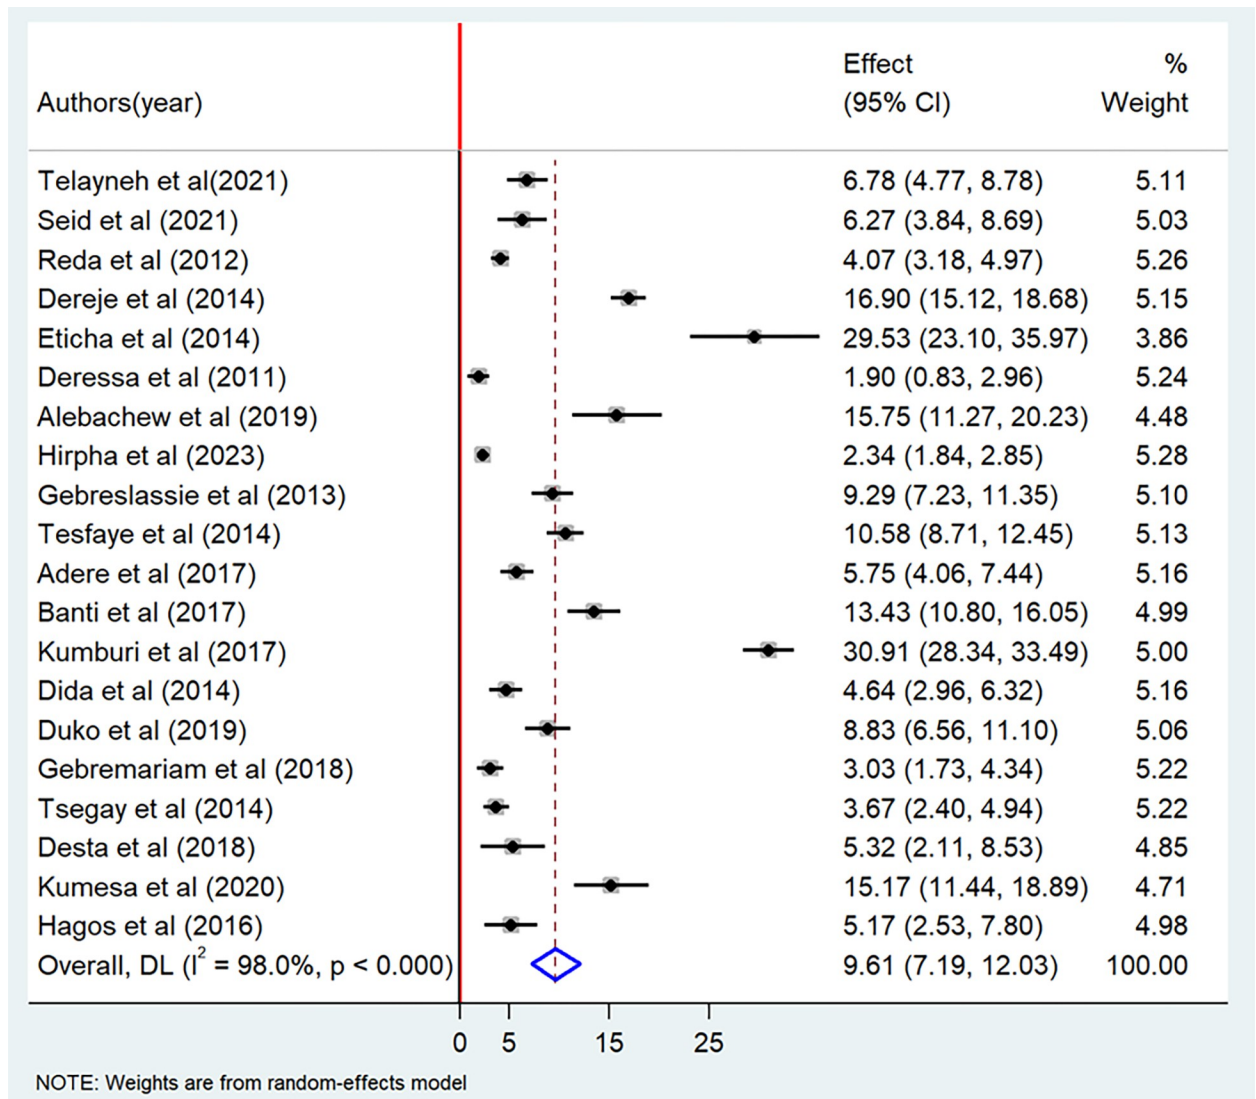

Fig 3. Forest plot of the pooled prevalence of current cigarette smoking among students in Ethiopia, 2023.

<https://doi.org/10.1371/journal.pone.0304948.g003>

pooled prevalence was observed among students in the Amhara region (8.26%, 95% CI: 5.90–10.61) (Fig 6). When categorized by type of student, the highest prevalence of lifetime cigarette smoking was reported among university students (14.08%, 95% CI: 8.32–19.85), followed by high school students (12.79%, 95% CI: 6.05–19.53) (Fig 7).

### Meta-regression and sensitivity analysis

To identify the possible sources of heterogeneity, a univariate meta-regression model was conducted, considering factors, such as publication year, sample size, and type of student. However, none of these variables demonstrated statistical significance (Table 2). Furthermore, a sensitivity analysis was performed to evaluate the impact of individual studies on the overall pooled estimate of cigarette smoking, and the results indicated that no single study exerted a significant effect (Fig 8).

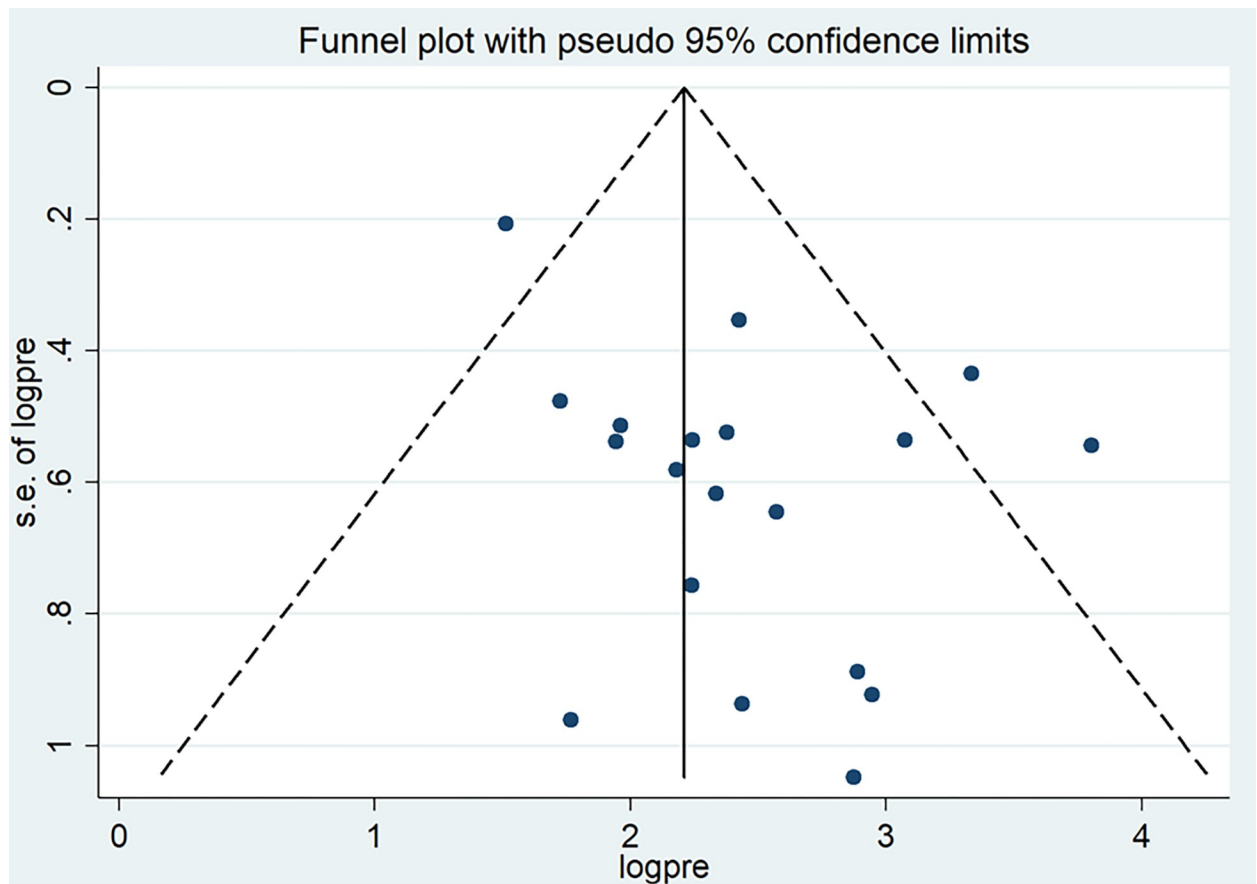

Fig 4. Funnel plot of the pooled prevalence of lifetime cigarette among students in Ethiopia, 2023.

<https://doi.org/10.1371/journal.pone.0304948.g004>

### Factors associated with lifetime cigarette smoking

As displayed in Figs 9 and 10, living in urban areas and alcohol consumption are significant factors associated with cigarette smoking. Urban resident students were almost three times more likely to smoke cigarettes than rural students (OR = 2.9; 95% CI: 1.15–7.28). Indeed, significant heterogeneity was observed among the included articles ( $I^2 = 93.1\%$ ,  $P < 0.001$ ) (Fig 9). Furthermore, the analysis revealed that students who have alcohol consumption habit had odds of cigarette smoking that were four times higher than their counterparts (OR = 4.79; 95% CI: 1.57–14.64). However, the included articles exhibited extreme heterogeneity ( $I^2 = 96.9\%$ ,  $P < 0.001$ ) (Fig 10). The results from two studies [19, 33] indicated positive association between having health information and cigarette smoking, while three studies [22, 29, 37] suggested a negative association. However, when subjected to meta-analysis, the presence of health information about cigarette smoking did not demonstrate a significant association with cigarette smoking, with an odds ratio of 0.74 (95% CI: 0.11–5.03) (S3 File).

### The association between illegal drug use and cigarette smoking

Among the twenty-two studies included, four of them [20–23] specifically examined the association between illegal drug use and cigarette smoking. All of these studies consistently demonstrated a significant association. The results from the random-effects analysis revealed



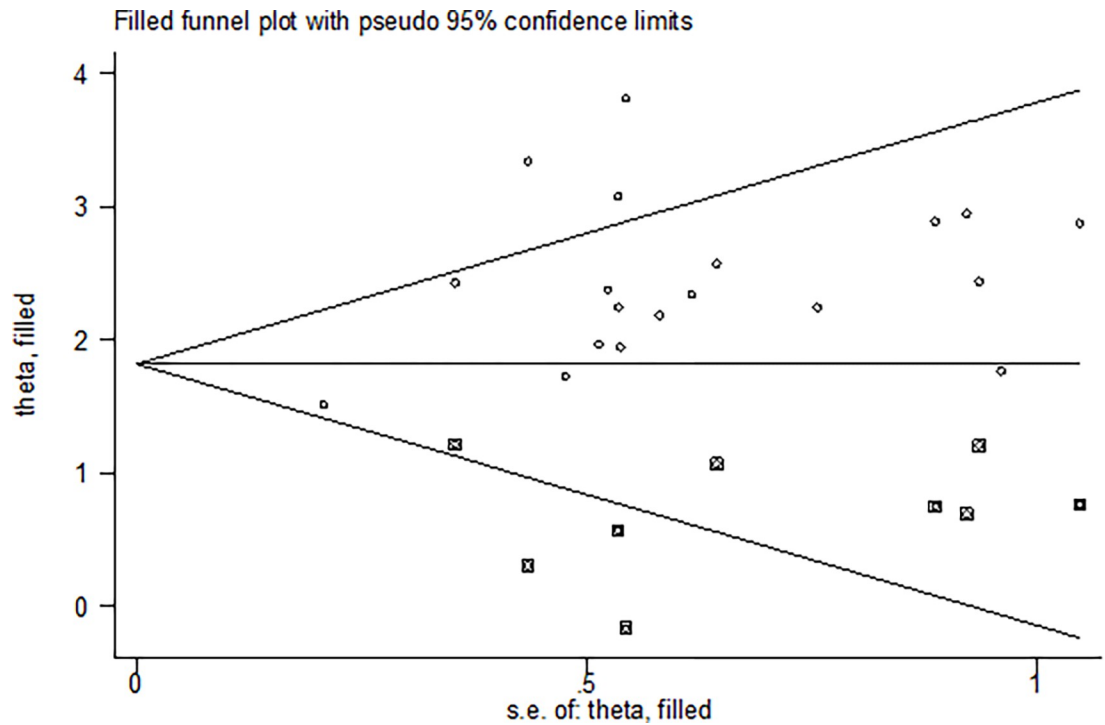

Fig 5. The funnel plot of a simulated meta-analysis.

<https://doi.org/10.1371/journal.pone.0304948.g005>

notably higher odds of cigarette smoking among students who had engaged in illegal drug use compared to those who had not (OR = 23.57; 95% CI: 10.87–51.1) (Fig 11).

## Discussion

The pooled prevalence of lifetime cigarette smoking was found to be 13.8% (95% CI: 9.90–17.82). This figure is lower compared to previous reports in India (54%) [43], Kenya (38.6%) [44], Cameroon (93.1%) [45], Zimbabwe (28.8%) [46], South Africa (16.9%) [47], and Jamaica (16.7%) [48]. The low figure in Ethiopia could be associated with inaccessibility and unavailability of substances, and the influence of strict and condemning cultural and religious norms in the society.

The student-type subgroup analysis conducted in this meta-analysis revealed significant variation in cigarette smoking among different types of students. The finding indicated that university students had a higher level of cigarette smoking as compared to high school students. Our finding was consistent with a previous systematic review and meta-analysis conducted in Ethiopia [5]. This high prevalence among university students could be due to the fact that most of the university students do not live with their families, and therefore they are free from family control. As a result, the students may start a new life away from their families, which could involve cigarette smoking [49].

Our meta-analysis showed that the odds of cigarette smoking were twenty-three times higher among the students who used illegal drugs than those who did not use illegal drugs. This finding is consistent with studies conducted in Thailand [50], six European countries [51], university students in Iran [52], and college students in United States [53]. This finding is also supported by a study conducted in Malaysia, which indicated that the students who used illegal drugs were six times more likely to experience cigarette smoking than their counterparts

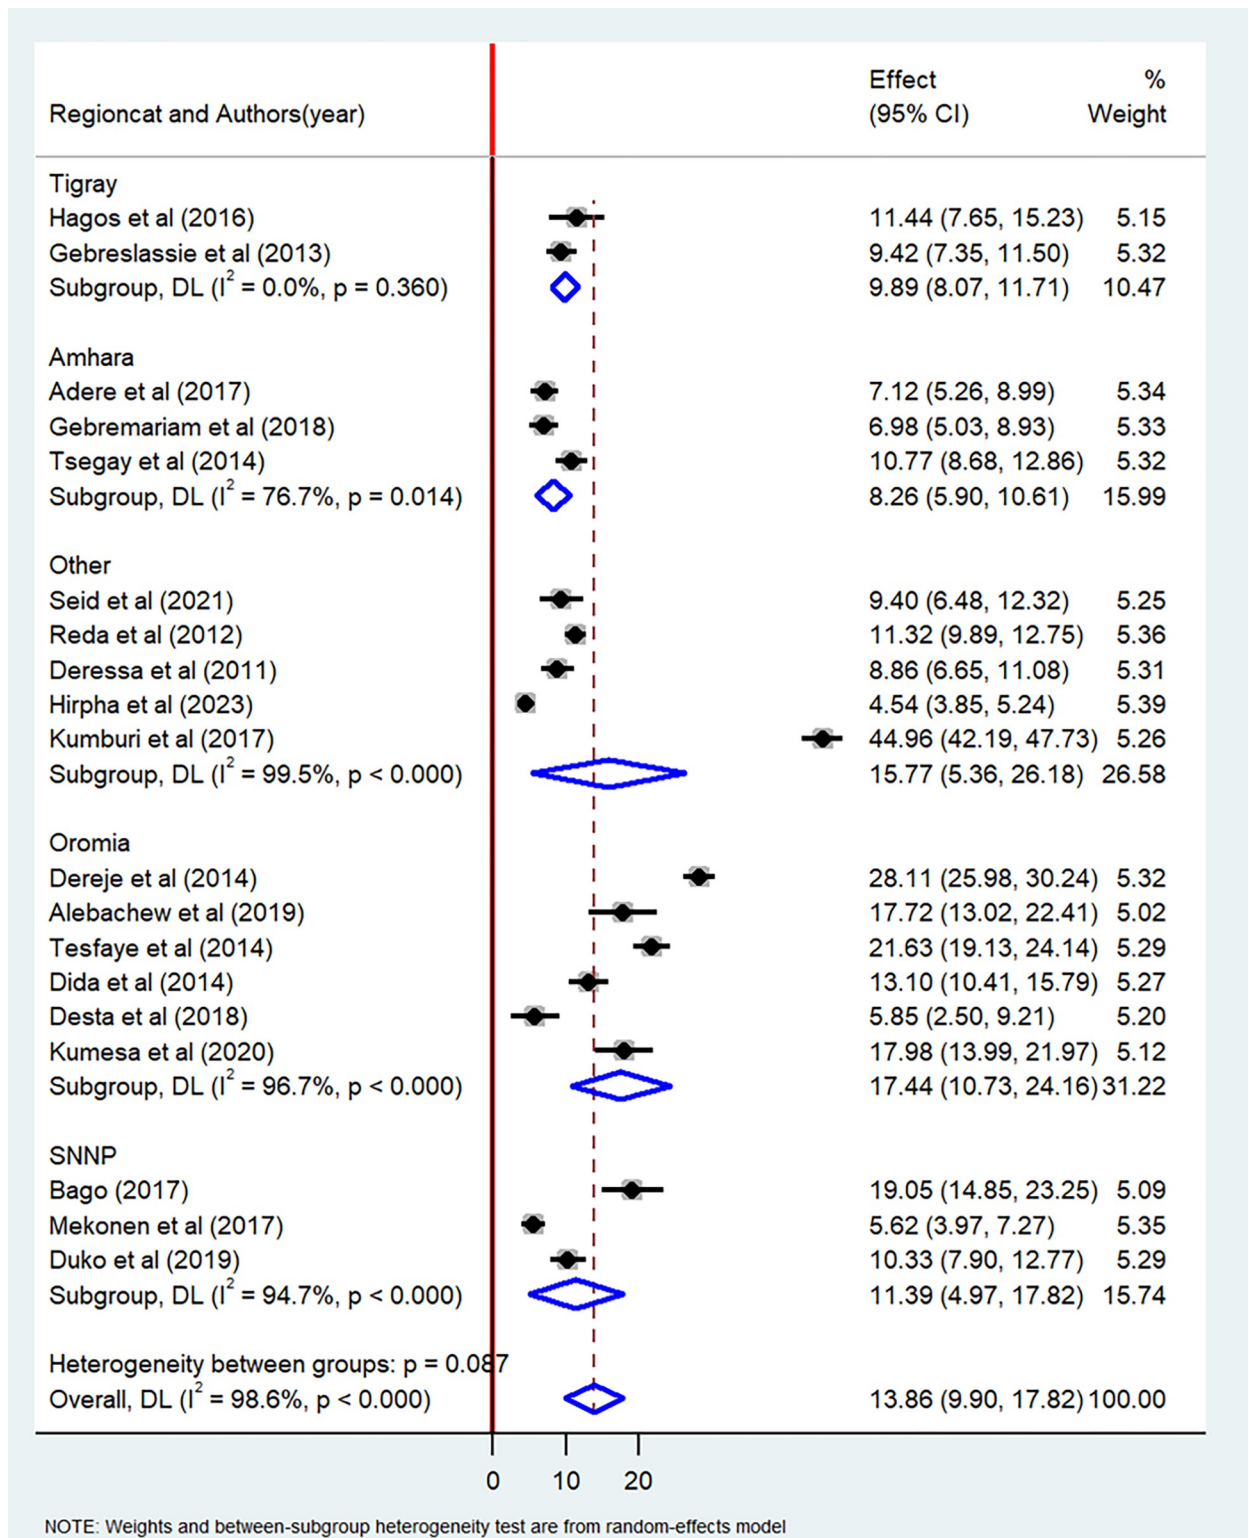

Fig 6. Subgroup analysis by region of the pooled prevalence of lifetime cigarette smoking among students in Ethiopia, 2023.

<https://doi.org/10.1371/journal.pone.0304948.g006>

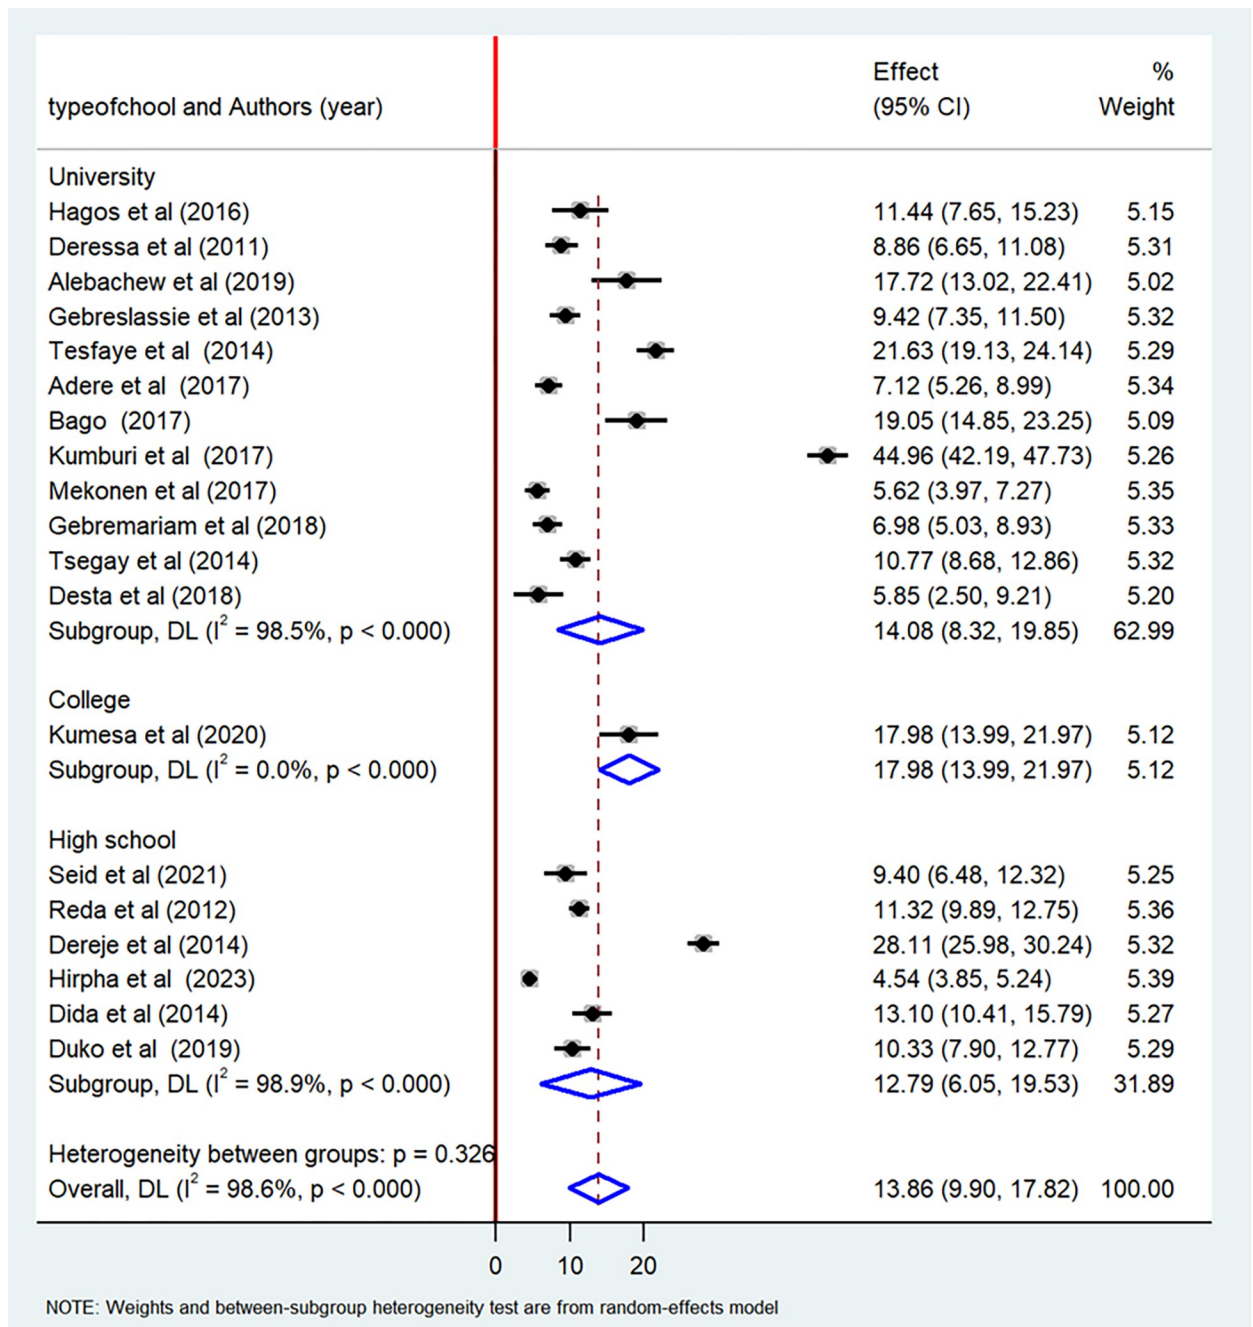

Fig 7. Subgroup analysis by type of school of the pooled prevalence of lifetime cigarette smoking among students in Ethiopia, 2023.

<https://doi.org/10.1371/journal.pone.0304948.g007>

Table 2. Univariate meta-regression analysis to identify factors associated with the heterogeneity of the prevalence of cigarette smoking in Ethiopia, 2023.

| Variables           | Coefficient | P-value |
|---------------------|-------------|---------|
| Type of school      | -.0976517   | 0.803   |
| Sample size         | -.7033893   | 0.401   |
| Year of publication | .8179578    | 0.106   |

<https://doi.org/10.1371/journal.pone.0304948.t002>

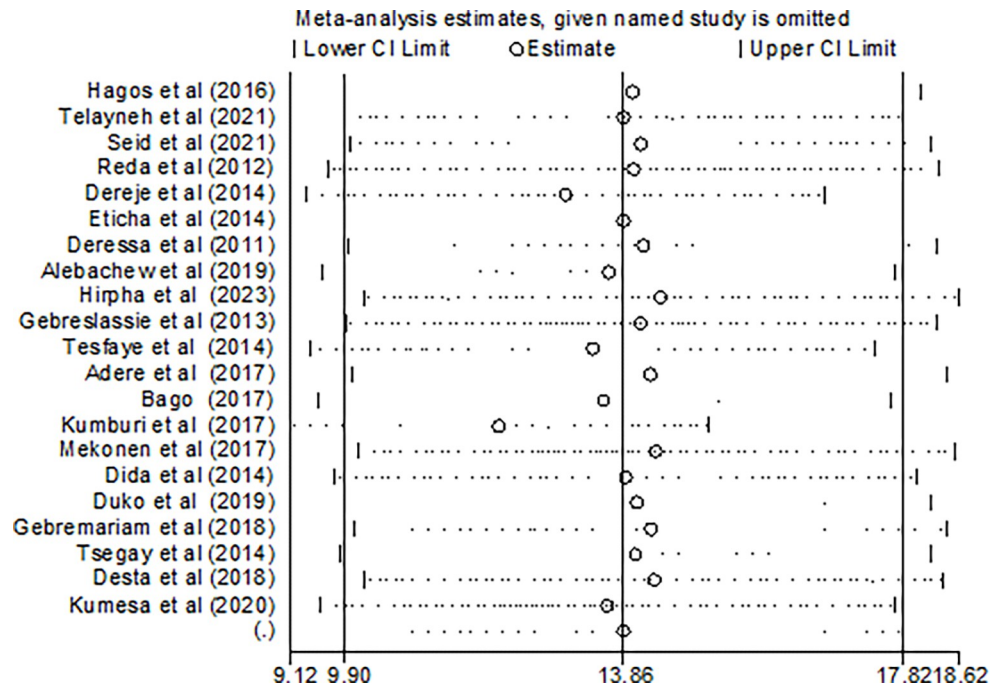

Fig 8. Sensitivity analysis of the included studies.

<https://doi.org/10.1371/journal.pone.0304948.g008>

[54]. While utilizing illegal drugs, the students could easily access cigarette as well. The students could also be easily influenced by their illegal-drug-using peers, which would enhance the prevalence of cigarette smoking. In fact, previous reports also indicated that students who

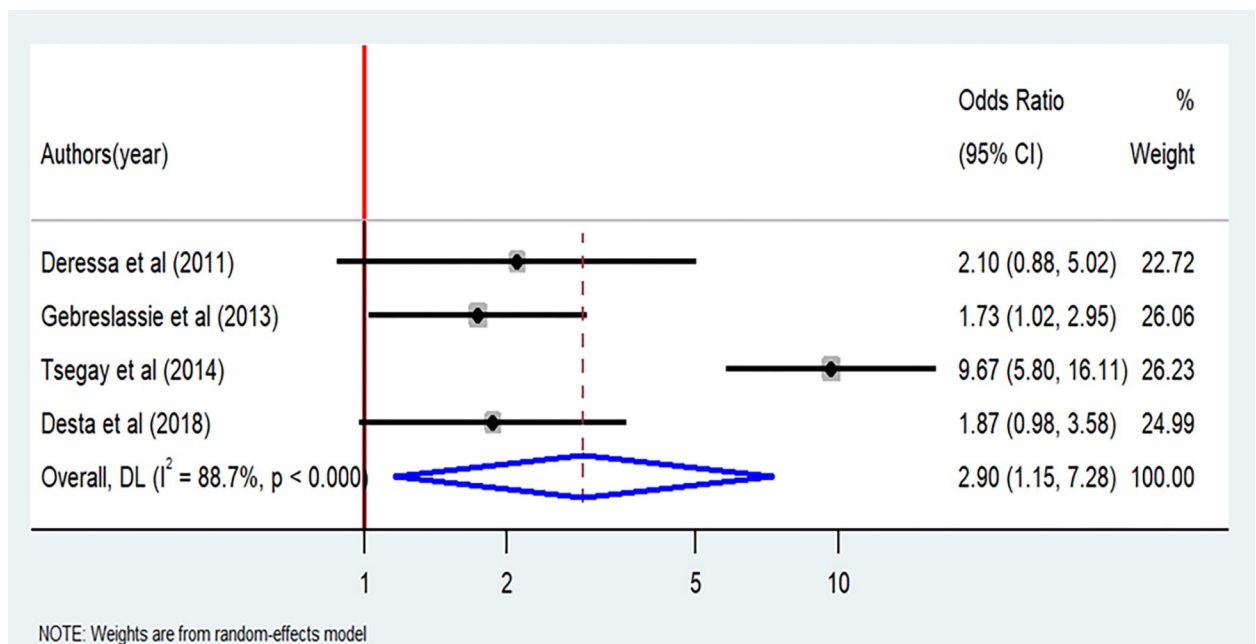

Fig 9. Forest plot of odds ratio for the association between residence and cigarette smoking among students in Ethiopia, 2023.

<https://doi.org/10.1371/journal.pone.0304948.g009>

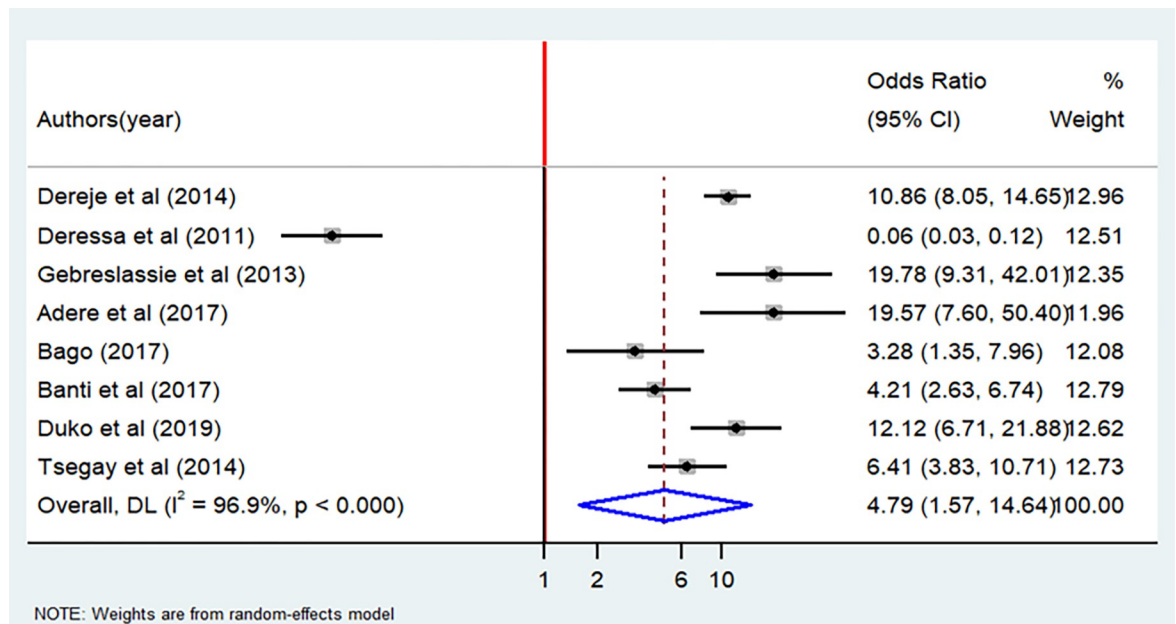

**Fig 10.** Forest plot of odds ratio for the association between alcohol consumption and cigarette smoking among students in Ethiopia, 2023.

<https://doi.org/10.1371/journal.pone.0304948.g010>

had cigarette smoking friends were more likely to experience cigarette smoking than the students who had no cigarette smoking friends [5].

The students who lived in the urban residence were three times more likely to experience cigarette smoking than their counterparts, which is consistent with studies done in Sub-Saharan Africa [55] and Ethiopia [56]. Conversely, our finding contradicts with other studies done in the USA [57] and Sub-Saharan Africa [58]; which indicated that rural residents were more likely to smoke than urban residents. This might suggest misclassification of urban and rural residences in the sample can produce misleading results, which should be interpreted with

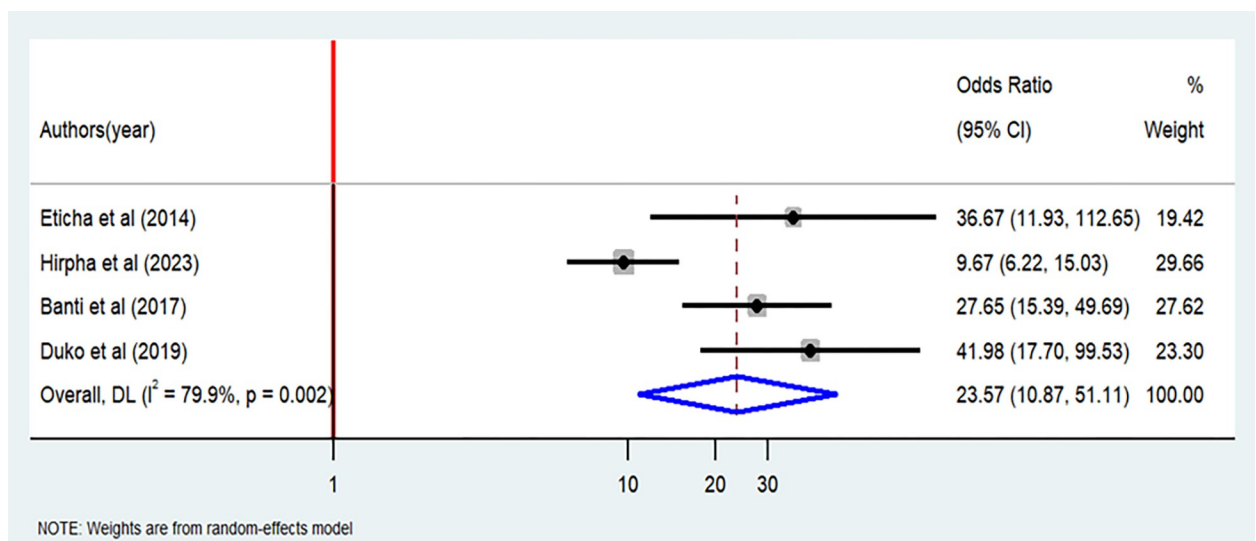

**Fig 11.** Association between illegal drug use and cigarette smoking among students in Ethiopia, 2023.

<https://doi.org/10.1371/journal.pone.0304948.g011>

caution. Of course, differences between the study countries and the level of urbanization also matters. The odds of cigarette smoking were five times higher among the students who experienced alcohol consumption as compared to the students who did not drink alcohol. This finding was consistent with studies done in Bolivia [59], Jimma (Ethiopia) [60, 61], Zimbabwe [46], and China [62]. This could be because different forms of substance abuses, such as cigarette smoking and alcohol consumption, are highly interrelated.

### Limitation and strength of the study

This systematic review and meta-analysis used an updated PRISMA checklist, ensuring a high-quality and reliable analysis for readers. To our knowledge, this meta-analysis was the first research that explored the association between illegal drug use and cigarette smoking among students in Ethiopia, which could help for policy and decision makers, and researchers. However, this meta-analysis did not represent all regions of Ethiopia as only four studies were included to examine the association between illegal drug use and cigarette smoking.

### Conclusions

More than one in eight of the Ethiopian students had experienced lifetime cigarette smoking. We found that illegal drug use has a significant association with cigarette smoking. Urban residence and alcohol use were also identified as the determinants of the student's lifetime cigarette smoking. Therefore, the government, ministry of education, universities, and directors of schools should create awareness about the health effects of illegal drug and cigarette smoking among the students. Moreover, illegal drug use, cigarette smoking, and alcohol control law enforcement should be strengthened. As only few cross-sectional studies are included in this meta-analysis, future investigations are needed to determine the causal relationship between illegal drug use and cigarette smoking, and hence to explore effective intervention strategies.

### Supporting information

**S1 Checklist. PRISMA 2020 checklist.**

(DOCX)

**S1 File.**

(XLSX)

**S2 File. Results of JBI quality assessment.**

(DOCX)

**S3 File.**

(DOCX)

### Author Contributions

**Conceptualization:** Chala Daba, Mesfin Gebrehiwot, Yonatal Mesfin Tefera.

**Data curation:** Chala Daba, Sisay Abebe Debela, Belay Desye, Yonatal Mesfin Tefera.

**Formal analysis:** Chala Daba, Mesfin Gebrehiwot, Sisay Abebe Debela, Belay Desye, Yonatal Mesfin Tefera.

**Funding acquisition:** Chala Daba, Yonatal Mesfin Tefera.

**Investigation:** Chala Daba, Mesfin Gebrehiwot, Sisay Abebe Debela, Belay Desye, Yonatal Mesfin Tefera.

**Methodology:** Chala Daba, Mesfin Gebrehiwot, Sisay Abebe Debela, Belay Desye, Yonatal Mesfin Tefera.

**Project administration:** Chala Daba, Sisay Abebe Debela.

**Resources:** Chala Daba, Mesfin Gebrehiwot, Sisay Abebe Debela, Belay Desye.

**Software:** Chala Daba, Sisay Abebe Debela, Belay Desye.

**Supervision:** Chala Daba, Mesfin Gebrehiwot, Yonatal Mesfin Tefera.

**Validation:** Chala Daba, Mesfin Gebrehiwot, Sisay Abebe Debela, Yonatal Mesfin Tefera.

**Visualization:** Chala Daba, Mesfin Gebrehiwot, Sisay Abebe Debela, Belay Desye, Yonatal Mesfin Tefera.

**Writing – original draft:** Chala Daba, Mesfin Gebrehiwot, Sisay Abebe Debela, Belay Desye.

**Writing – review & editing:** Chala Daba, Mesfin Gebrehiwot, Yonatal Mesfin Tefera.

## References

1. Gashaw A, Teshita A, Getachew T. Environmental tobacco smoke exposure and its health impacts: a review. *International Journal of Biological and Chemical Sciences*. 2016; 10(3):1371–81.
2. WHO. World Health Organization report on the global tobacco epidemic. Geneva 2019. Available at <https://www.who.int/publications/i/item/9789241516204>. 2019.
3. Horwood LJ, Fergusson DM, Hayatbakhsh MR, Najman JM, Coffey C, Patton GC, et al. Cannabis use and educational achievement: findings from three Australasian cohort studies. *Drug and alcohol dependence*. 2010; 110(3):247–53. <https://doi.org/10.1016/j.drugalcdep.2010.03.008> PMID: 20456872
4. Peacock A, Leung J, Larney S, Colledge S, Hickman M, Rehm J, et al. Global statistics on alcohol, tobacco and illicit drug use: 2017 status report. *Addiction*. 2018; 113(10):1905–26. <https://doi.org/10.1111/add.14234> PMID: 29749059
5. Leshargie CT, Alebel A, Kibret GD, Birhanu MY, Mulugeta H, Malloy P, et al. The impact of peer pressure on cigarette smoking among high school and university students in Ethiopia: A systemic review and meta-analysis. *PLoS One*. 2019; 14(10):e0222572. <https://doi.org/10.1371/journal.pone.0222572> PMID: 31603930
6. WHO. World Health Organization report on the global tobacco epidemic, 2015. Geneva, Switzerland: World Health Organization; 2015. 2015.
7. Ogundipe O, Amoo E, Adeloye D, Olawole-Isaac A. Substance use among adolescents in sub-Saharan Africa: A systematic review and meta-analysis. *South African Journal of Child Health*. 2018; 2018(1): s79–s84.
8. Blanco C, Hasin DS, Wall MM, Flórez-Salamanca L, Hoertel N, Wang S, et al. Cannabis use and risk of psychiatric disorders: prospective evidence from a US national longitudinal study. *JAMA psychiatry*. 2016; 73(4):388–95. <https://doi.org/10.1001/jamapsychiatry.2015.3229> PMID: 26886046
9. Talati A, Keyes K, Hasin D. Changing relationships between smoking and psychiatric disorders across twentieth century birth cohorts: clinical and research implications. *Molecular psychiatry*. 2016; 21(4):464–71. <https://doi.org/10.1038/mp.2015.224> PMID: 26809837
10. Beydoun MA, Beydoun HA, Gamaldo AA, Teel A, Zonderman AB, Wang Y. Epidemiologic studies of modifiable factors associated with cognition and dementia: systematic review and meta-analysis. *BMC public health*. 2014; 14:1–33.
11. An R, Xiang X. Smoking, heavy drinking, and depression among US middle-aged and older adults. *Preventive medicine*. 2015; 81:295–302.
12. Evins A, Korhonen T, Kinnunen T, Kaprio J. Prospective association between tobacco smoking and death by suicide: a competing risks hazard analysis in a large twin cohort with 35-year follow-up. *Psychological Medicine*. 2017; 47(12):2143–54. <https://doi.org/10.1017/S0033291717000587> PMID: 28399944
13. World Drug Report 2018 (United Nations publication, Sales No. E.18.XI.9).
14. Murray CJ, Abraham J, Ali MK, Alvarado M, Atkinson C, Baddour LM, et al. The state of US health, 1990–2010: burden of diseases, injuries, and risk factors. *Jama*. 2013; 310(6):591–606. <https://doi.org/10.1001/jama.2013.13805> PMID: 23842577

15. WHO. World Health Organization: World Drug Report 2018, United Nations Publication, Sales No. E. 18. XI. 9. World Health Organization Geneva; 2018.
16. Kebede Y, Abula T, Ayele B, Feleke A, Degu G, Kifle A. Substances abuse for the Ethiopian health center team. *Ethiop Public Health Train Initiative*. 2005;81.
17. Kumburi GT, Gelgile AK, Hatehu BT, Gemechu DT. Psycho-active substances use and determining factors among regular undergraduate students of Dire-Dawa University, eastern Ethiopia. *Science journal of public health*. 2017; 5(2):68–76.
18. Alebachew W, Semahegn A, Ali T, Mekonnen H. Prevalence, associated factors and consequences of substance use among health and medical science students of Haramaya University, eastern Ethiopia, 2018: a cross-sectional study. *BMC psychiatry*. 2019; 19(1):1–9.
19. Dereje N, Abazinab S, Girma A. Prevalence and predictors of cigarette smoking among adolescents of Ethiopia: school based cross sectional survey. 2014.
20. Banti TK, Mengesha DS, Mamade GF. Prevalence of cigarette smoking and factors associated with it among undergraduate students of Jigjiga university. *International Journal of Psychological and Brain Sciences*. 2017; 2(3):87–91.
21. Duko B, Melese Y, Ebrahim J. Determinants of cigarette smoking among adolescents in Ethiopia: A cross-sectional study. *Tobacco induced diseases*. 2019;17.
22. Eticha T, Kidane F. The prevalence of and factors associated with current smoking among College of Health Sciences students, Mekelle University in northern Ethiopia. *PloS one*. 2014; 9(10):e111033. <https://doi.org/10.1371/journal.pone.0111033> PMID: 25340844
23. Hirpa S, Fogarty AW, Addissie A, Bauld L, Frese T, Unverzagt S, et al. Prevalence and risk factors for tobacco, khat, and alcohol consumption among high school students in Ethiopia. *BMC public health*. 2023; 23(1):1–9.
24. Page MJ, McKenzie JE, Bossuyt PM, Boutron I, Hoffmann TC, Mulrow CD, et al. The PRISMA 2020 statement: an updated guideline for reporting systematic reviews. *International journal of surgery*. 2021; 88:105906. <https://doi.org/10.1016/j.ijso.2021.105906> PMID: 33789826
25. Peters MD, Godfrey CM, Mclnerney P, Soares CB, Khalil H, Parker D. The Joanna Briggs Institute reviewers' manual 2015: methodology for JBI scoping reviews. 2015.
26. Higgins JP, Thompson SG. Quantifying heterogeneity in a meta-analysis. *Stat Med*. 2002; 21(11):1539–58. <https://doi.org/10.1002/sim.1186> PMID: 12111919
27. Egger M, Schneider M, Minder C. Bias in meta-analysis detected by a simple, graphical test. *Bmj*. 1997; 315(7109):629–34. <https://doi.org/10.1136/bmj.315.7109.629> PMID: 9310563. 1998.
28. Adere A, Yimer NB, Kumsa H, Liben ML. Determinants of psychoactive substances use among Woldia University students in Northeastern Ethiopia. *BMC research notes*. 2017; 10(1):1–7.
29. Bago BJ. Prevalence of cigarette smoking and its associated risk factors among students of Hawassa University, College of Medicine and Health Sciences, 2016. *J Addict Res Ther*. 2017; 8(4):2.
30. Deressa W, Azazh A. Substance use and its predictors among undergraduate medical students of Addis Ababa University in Ethiopia. *BMC public health*. 2011; 11:1–11.
31. Desta E, Soboka M, Workneh D, Gashaw BT. The prevalence of substance use and associated factors among medical interns of Jimma University, South West Ethiopia. *Journal of Substance Abuse & Alcoholism*. 2018; 6(1):1071.
32. Gebremariam TB, Mruts KB, Neway TK. Substance use and associated factors among Debre Berhan University students, Central Ethiopia. *Substance abuse treatment, prevention, and policy*. 2018; 13(1):1–8.
33. Gebreslassie M, Feleke A, Melese T. Psychoactive substances use and associated factors among Axum University students, Axum Town, North Ethiopia. *BMC public health*. 2013; 13(1):1–9. <https://doi.org/10.1186/1471-2458-13-693> PMID: 23895376
34. Hagos EG, Asfeha GG, Berihu BA. Prevalence of substance abuse among regular degree health science students in Sheba University College in Mekelle Town, Tigray-Ethiopia. *Journal of neurosciences in rural practice*. 2016; 7(02):200–5. <https://doi.org/10.4103/0976-3147.178670> PMID: 27114648
35. Mekonen T, Fekadu W, Mekonnen TC, Workie SB. Substance use as a strong predictor of poor academic achievement among university students. *Psychiatry journal*. 2017;2017.
36. Tesfaye G, Derese A, Hambisa MT. Substance use and associated factors among university students in Ethiopia: a cross-sectional study. *Journal of addiction*. 2014;2014. <https://doi.org/10.1155/2014/969837> PMID: 24872903
37. Tsegay G. Psychoactive substances use (khat, alcohol and tobacco) and associated factors among Debre Markos University Students, North-West Ethiopia, 2013. 2014.



38. Dida N, Kassa Y, Sirak T, Zerga E, Dessalegn T. Substance use and associated factors among preparatory school students in Bale Zone, Oromia Regional State, Southeast Ethiopia. *Harm reduction journal*. 2014; 11:1–6.
39. Reda AA, Moges A, Yazew B, Biadgilign S. Determinants of cigarette smoking among school adolescents in eastern Ethiopia: a cross-sectional study. *Harm reduction journal*. 2012; 9(1):1–6. <https://doi.org/10.1186/1477-7517-9-39> PMID: 23227891
40. Seid L, Gintamo B, Mekuria ZN, Hassen HS, Gizaw Z. Substance use and associated factors among preparatory school students in Kolfe-Keranyo sub-city of Addis Ababa, Ethiopia. *Environmental health and preventive medicine*. 2021; 26:1–12.
41. Kumesa S, Mohammed M, Gebremariam E, Gelaw B, Seifu M. The prevalence and pattern of social drug abuse among students of rift Valley University college, Bishoftu campus, 2014, Bishoftu, Ethiopia. *Journal of Pharmaceutical Care & Health Systems*. 2015; 2(1):131.
42. Telayneh AT, Gedefaw M, Haile D, Habtegiorgis SD, Getahun DS, Tafere Y, et al. Cigarette smoking prevalence and associated factors among college students, Amhara, Ethiopia. *Pan African Medical Journal*. 2021; 40(1). <https://doi.org/10.11604/pamj.2021.40.170.24413> PMID: 34970412
43. Ningombam S, Hutin Y, Murhekar MV. Prevalence and pattern of substance use among the higher secondary school students of Imphal, Manipur, India. *The National medical journal of India*. 2011; 24(1):11–5.
44. Kwamanga D, Odhiambo J, Amukoye E. Prevalence and risk factors of smoking among secondary school students in Nairobi. *East African medical journal*. 2003; 80(4):207–12. <https://doi.org/10.4314/eamj.v80i4.8644> PMID: 12918805
45. Mbatchou Ngahane B, Luma H, Mapoure Y, Fotso Z, Afane Ze E. Correlates of cigarette smoking among university students in Cameroon. *The International Journal of Tuberculosis and Lung Disease*. 2013; 17(2):270–4. <https://doi.org/10.5588/ijtld.12.0377> PMID: 23317965
46. Bandason T, Rusakaniko S. Prevalence and associated factors of smoking among secondary school students in Harare Zimbabwe. *Tobacco Induced Diseases*. 2010; 8:1–9.
47. Bayat M, Pillay BJ, Cassimjee MH. Cigarette smoking behavior among South African Indian high school students. *Journal of Family & Community Medicine*. 1998; 5(1):51. PMID: 23008583
48. Muula AS, Siziya S, Rudatsikira E. Cigarette smoking and associated factors among in-school adolescents in Jamaica: comparison of the Global Youth Tobacco Surveys 2000 and 2006. *BMC Research Notes*. 2008; 1(1):1–6. <https://doi.org/10.1186/1756-0500-1-55> PMID: 18710508
49. Haghdoost AA, Moosazadeh M. The prevalence of cigarette smoking among students of Iran's universities: A systematic review and meta-analysis. *Journal of research in medical sciences: the official journal of Isfahan University of Medical Sciences*. 2013; 18(8):717. PMID: 24379851
50. Pengpid S, Peltzer K. Prevalence and psychosocial correlates of illicit drug use among school-going adolescents in Thailand. *Journal of Social Sciences*. 2013; 34(3):269–75.
51. Kokkevi AE, Arapaki AA, Richardson C, Florescu S, Kuzman M, Stergar E. Further investigation of psychological and environmental correlates of substance use in adolescence in six European countries. *Drug and Alcohol Dependence*. 2007; 88(2–3):308–12. <https://doi.org/10.1016/j.drugalcdep.2006.10.004> PMID: 17113243
52. Kabir K, Mohammadpoorasl A, Esmaelpour R, Aghazamani F, Rostami F. Tobacco use and substance abuse in students of Karaj Universities. *International journal of preventive medicine*. 2016;7.
53. Gray NL. The relationship of cigarette smoking and other substance use among college students. *Journal of Drug Education*. 1993; 23(1):117–24. <https://doi.org/10.2190/7W66-52X5-LY0B-AE6R> PMID: 8487140
54. Yusoff F, Sahril N, Rasidi NM, Zaki NAM, Muhamad N, Ahmad N. Illicit drug use among school-going adolescents in Malaysia. *Asia Pacific Journal of Public Health*. 2014; 26(5\_suppl):100S–7S. <https://doi.org/10.1177/1010539514542425> PMID: 25038195
55. Pampel F. Tobacco use in sub-Saharan Africa: estimates from the demographic health surveys. *Social science & medicine*. 2008; 66(8):1772–83. <https://doi.org/10.1016/j.socscimed.2007.12.003> PMID: 18249479
56. Guliani H, Gamtessa S, Çule M. Factors affecting tobacco smoking in Ethiopia: evidence from the demographic and health surveys. *BMC Public Health*. 2019; 19(1):1–17.
57. Wiggins AT, Huntington-Moskos L, Rayens EA, Rayens MK, Noland M, Butler K, et al. Tobacco Use Among Rural and Urban US Middle and High School Students: National YouthTobacco Survey, 2011–2016. *The Journal of Rural Health*. 2020; 36(1):48–54. <https://doi.org/10.1111/jrh.12356> PMID: 30865335

58. Sreeramareddy CT, Pradhan PM, Sin S. Prevalence, distribution, and social determinants of tobacco use in 30 sub-Saharan African countries. *BMC medicine*. 2014; 12(1):1–13. <https://doi.org/10.1186/s12916-014-0243-x> PMID: 25518855
59. Dearden KA, Crookston BT, De La Cruz NG, Lindsay GB, Bowden A, Carlston L, et al. Teens in trouble: cigarette use and risky behaviors among private, high school students in La Paz, Bolivia. *Revista Panamericana de Salud Pública*. 2007; 22(3):160–8. <https://doi.org/10.1590/s1020-49892007000800002> PMID: 18062850
60. Jima SB, Tefera TB, Ahmed MB. Prevalence of Tobacco consumption, alcohol, Khat (*Catha Edulis*) use and high blood pressure among adults in Jimma Town, South West Ethiopia. *Science*. 2015; 3(5):650–4.
61. Zenebe Y, Feyissa GT, Krahl W. Cigarette smoking among Jimma University Teaching and referral hospital outpatients attending services at psychiatry clinic Southwest, Ethiopia. *Journal of Neuroscience and Behavioral Health*. 2016; 8(3):13–9.
62. Wang M, Zhong J-M, Fang L, Wang H. Prevalence and associated factors of smoking in middle and high school students: a school-based cross-sectional study in Zhejiang Province, China. *BMJ open*. 2016; 6(1):e010379. <https://doi.org/10.1136/bmjopen-2015-010379> PMID: 26769793
